# Supplementary material for: Strategic combination of Grignard reagents and allyl-functionalized ionic liquids as an advanced electrolyte for rechargeable magnesium batteries
Source: Royal Society of Chemistry journal article supplement (doi:10.1039/c7ta09330f), 2018-01-01
Supplement: c7ta09330f1.pdf [file c7ta09330f1.pdf]

Electronic Supplementary Information for

**Strategic combination of Grignard reagents and allyl-functionalized ionic liquids as an advanced electrolytes for rechargeable magnesium batteries**

Boeun Lee,<sup>a,b</sup> Jae-Hyun Cho,<sup>a</sup> Hyo Ree Seo,<sup>a</sup> Su Bin Na,<sup>a</sup> Jong Hak Kim,<sup>b</sup> Byung Won Cho,<sup>a</sup> Taeun Yim,<sup>\*c</sup> and Si Hyoung Oh<sup>\*c</sup>

<sup>a</sup> Centre for Energy Convergence Research, Korea Institute of Science and Technology, 5, Hwarang-ro 14-gil, Seoungbuk-gu, Seoul 02792, Korea

<sup>b</sup> Department of Chemical and Biomolecular Engineering, Yonsei University, 50, Yonsei-ro, Seodaemoon-gu, Seoul 03722, Korea

<sup>c</sup> Department of Chemistry, Research Institute of Basic Sciences, College of Natural Science, Incheon National University, 119, Academy-ro, Yeonsu-gu, Incheon 22012, Korea

This PDF file includes:

Supplementary Table S1

Supplementary Figures S1 to S11

**\* to whom correspondence should be addressed - S.H.O: sho74@kist.re.kr; T. Yim: yte0102@inu.ac.kr**

## Supplementary Table

**Table S1.** Ionic conductivities of electrolytes combining 0.4 M PhMgCl solution with 0 M, 0.1 M, 0.2 M, 0.3 M and 0.4 M of AMPyrrCl in THF, termed as PMC, (PMC)(AMPC)<sub>0.25</sub>, (PMC)(AMPC)<sub>0.5</sub>, (PMC)(AMPC)<sub>0.75</sub> and (PMC)(AMPC)<sub>1.0</sub>, respectively.

| Electrolyte                 | Ionic conductivity<br>(mS cm <sup>-1</sup> ) |
|-----------------------------|----------------------------------------------|
| 0.4 M PhMgCl                | 0.17                                         |
| (PMC)(AMPC) <sub>0.25</sub> | 0.60                                         |
| (PMC)(AMPC) <sub>0.5</sub>  | 0.61                                         |
| (PMC)(AMPC) <sub>0.75</sub> | 0.48                                         |
| (PMC)(AMPC) <sub>1.0</sub>  | 0.23                                         |

## Supplementary Figures

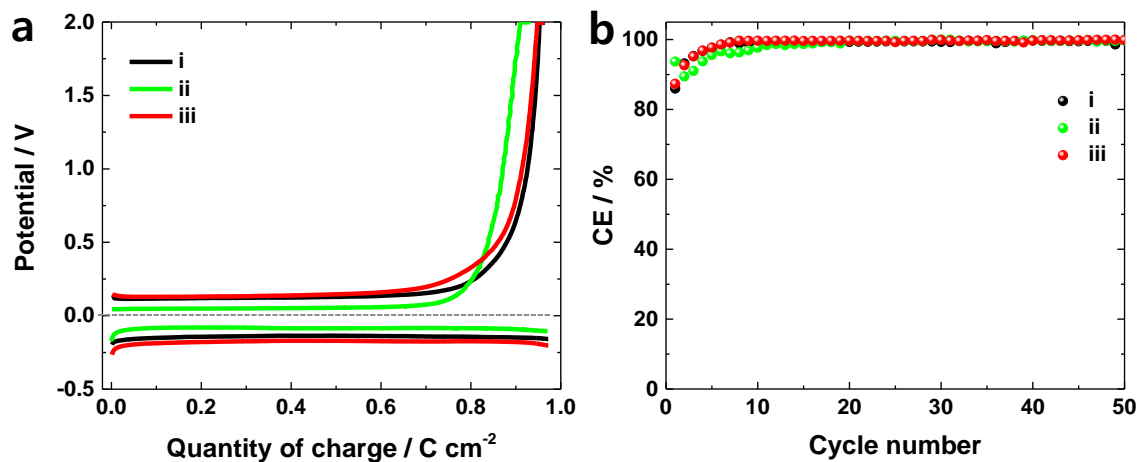

**Fig. S1. Characteristics of Mg deposition-stripping reaction for the various electrolytes investigated.** a) The chronopotentiograms of the 10<sup>th</sup> cycle for Mg deposition-stripping and b) the calculated cycling efficiency up to 50 cycles for the electrolytes of 0.4 M PhMgCl solutions combined with i) 0 M, ii) 0.2 M, and iii) 0.4 M of AMPyrrCl in THF. The galvanostatic Mg deposition-stripping was conducted with Ni as the working electrode at a current density of 0.135 mA cm<sup>-2</sup>. The coulombic efficiency of the electrolytes reached more than 99.5 % for all electrolytes after 50 cycles.

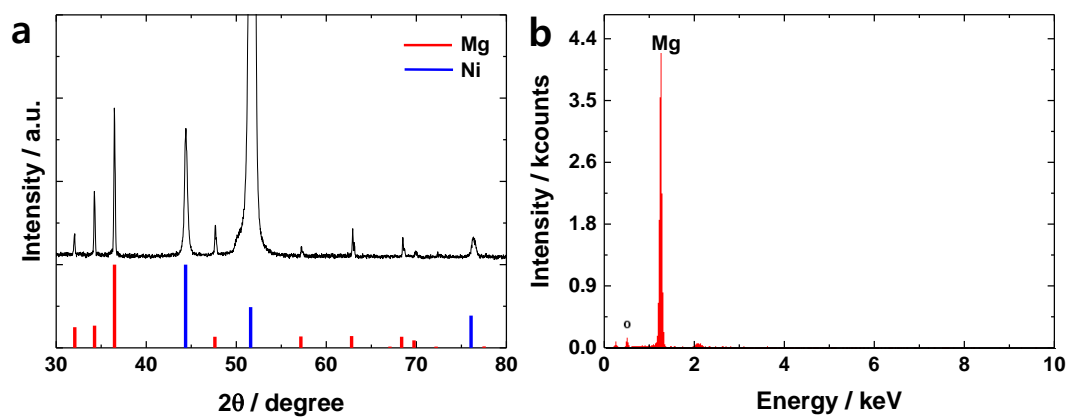

**Fig. S2. Identification of the deposit from an equimolar solution (0.4 M) of PhMgCl and AMPyrrCl in THF.** a) XRD pattern and b) EDS elemental analysis for the deposit on a Ni substrate. From these data, pure Mg metal was established to be a single dominant deposit from the electrolyte. A small amount of oxygen (~5 %) in the EDS spectrum originates from the metal oxide layer generated following exposure to air during the analysis.

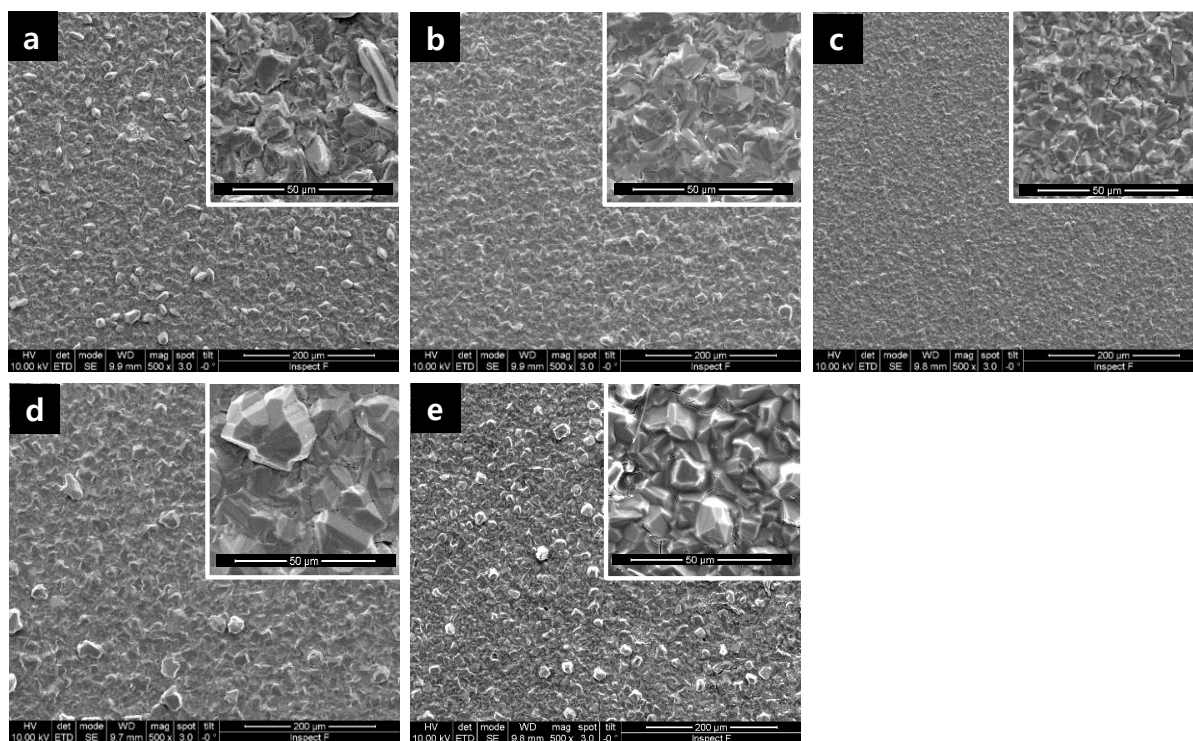

**Fig. S3. SEM images showing the morphological features of Mg deposits in the electrolytes containing a) pure 0.4 M PhMgCl, b) (PMC)(AMPC)<sub>0.25</sub>, c) (PMC)(AMPC)<sub>0.5</sub>, d) (PMC)(AMPC)<sub>0.75</sub>, and e) (PMC)(AMPC)<sub>1.0</sub> after the 1<sup>st</sup> deposition. All the deposits were obtained on Ni substrates at the total charge of 4.86 C cm<sup>-2</sup> (0.135 mA cm<sup>-2</sup>, 10 h). Round and grain-like morphology was observed regardless of the electrolytes and no dendrite was observed for all cases considered.**

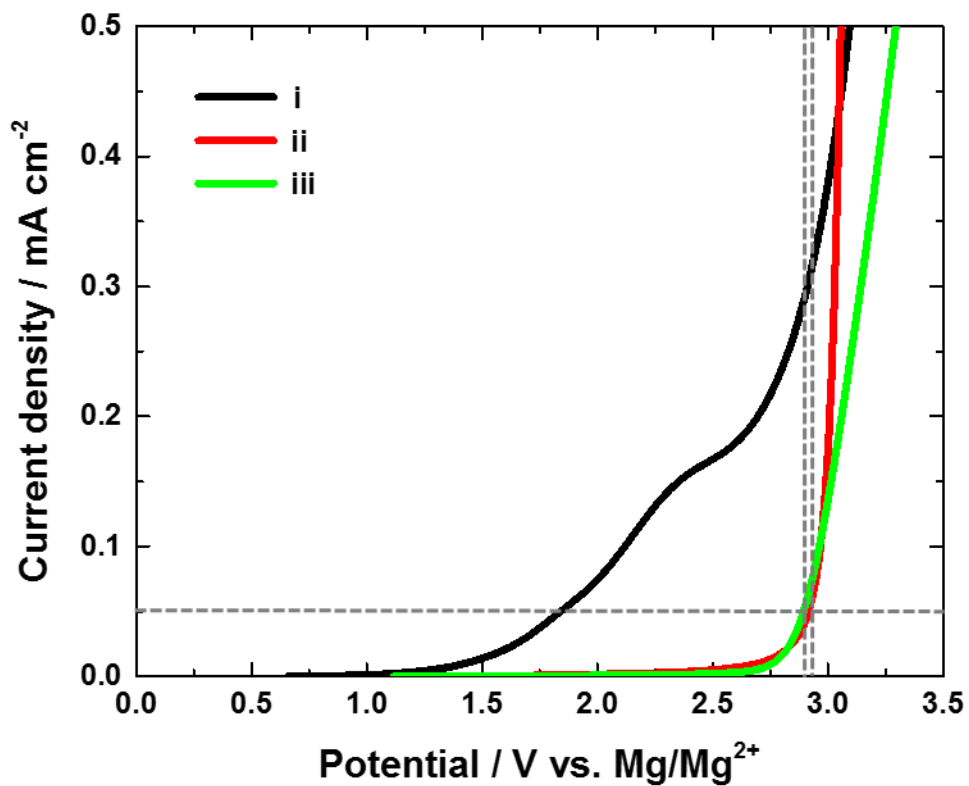

**Fig. S4. Comparison in the oxidative stability of the various electrolytes.** Linear sweep voltammograms of i) pure 0.4 M PhMgCl and 0.4 M PhMgCl solutions with ii) 0.2 M of AlCl<sub>3</sub> (APC solution) and iii) 0.4 M of AMPyrrCl in THF. All experiments were conducted with a Ni working electrode and Mg counter/reference electrodes at a scan rate of 25 mV s<sup>-1</sup>. Oxidative stability of the Grignard reagents increases dramatically by adding AlCl<sub>3</sub> or AMPyrrCl up to ~2.9 V vs. Mg/Mg<sup>2+</sup>.

**a**

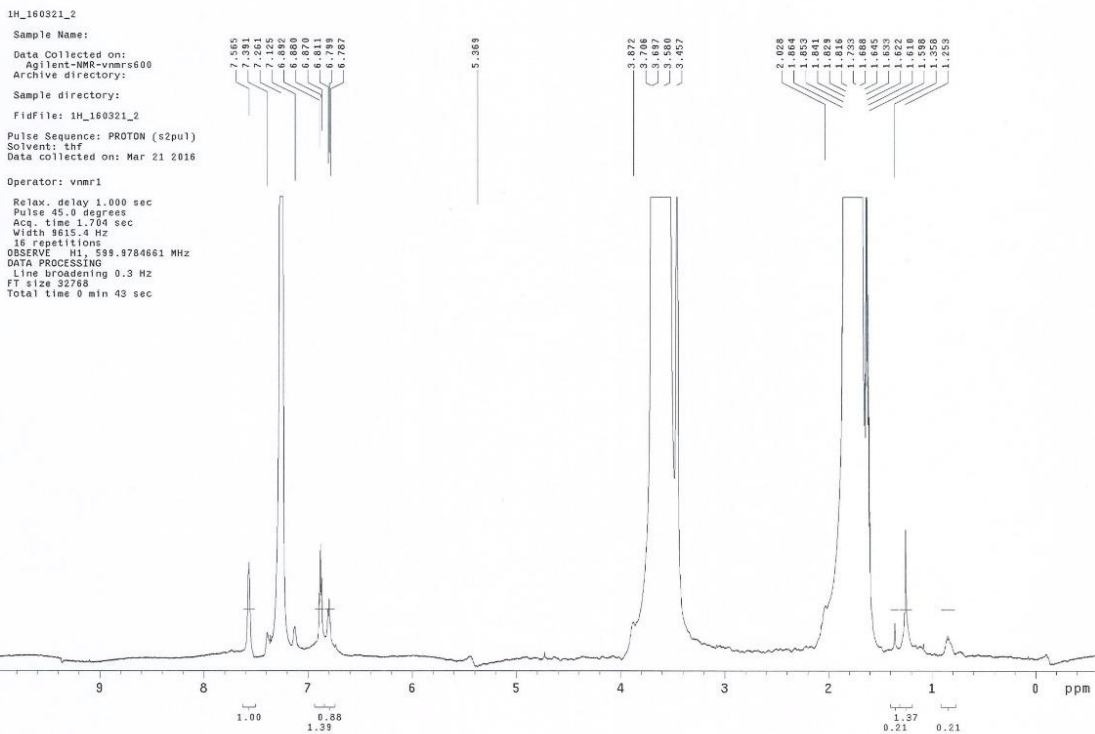

**b**

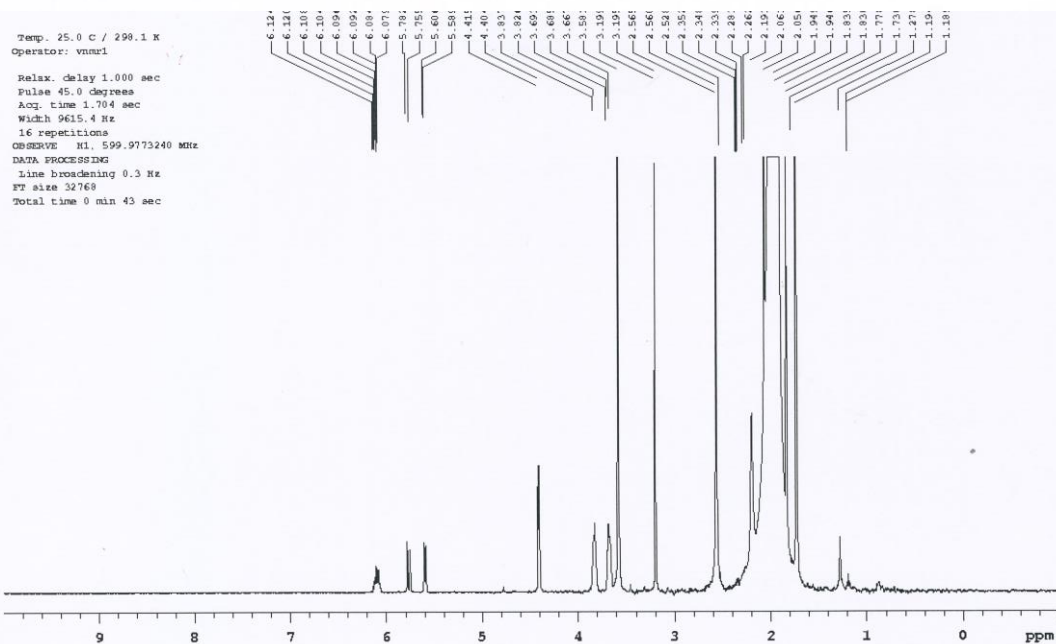

**c**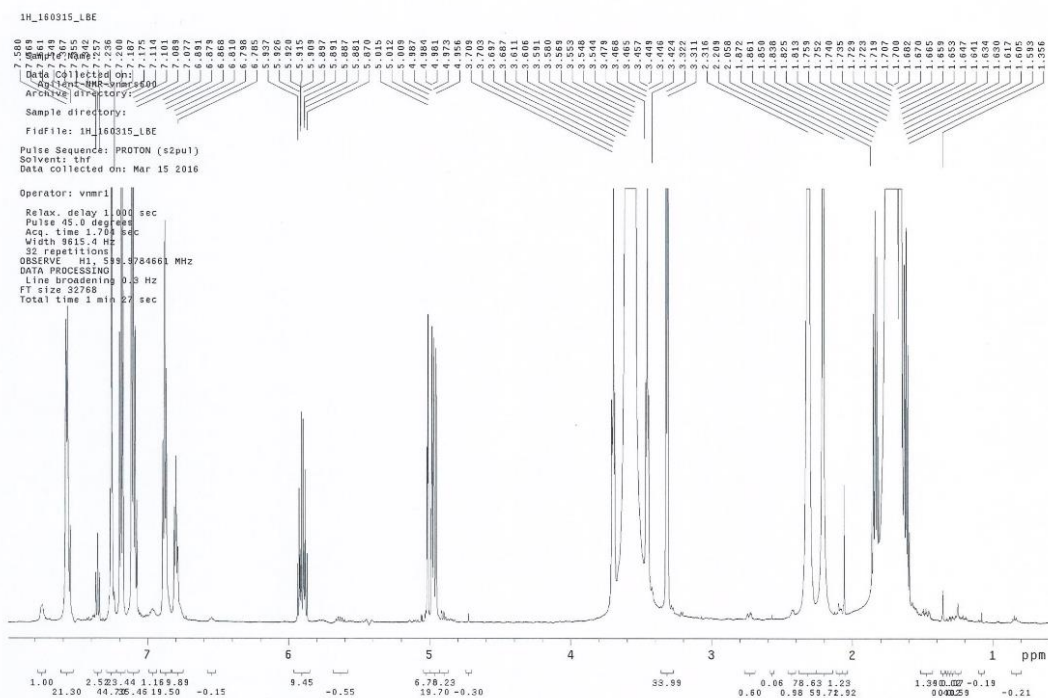**d**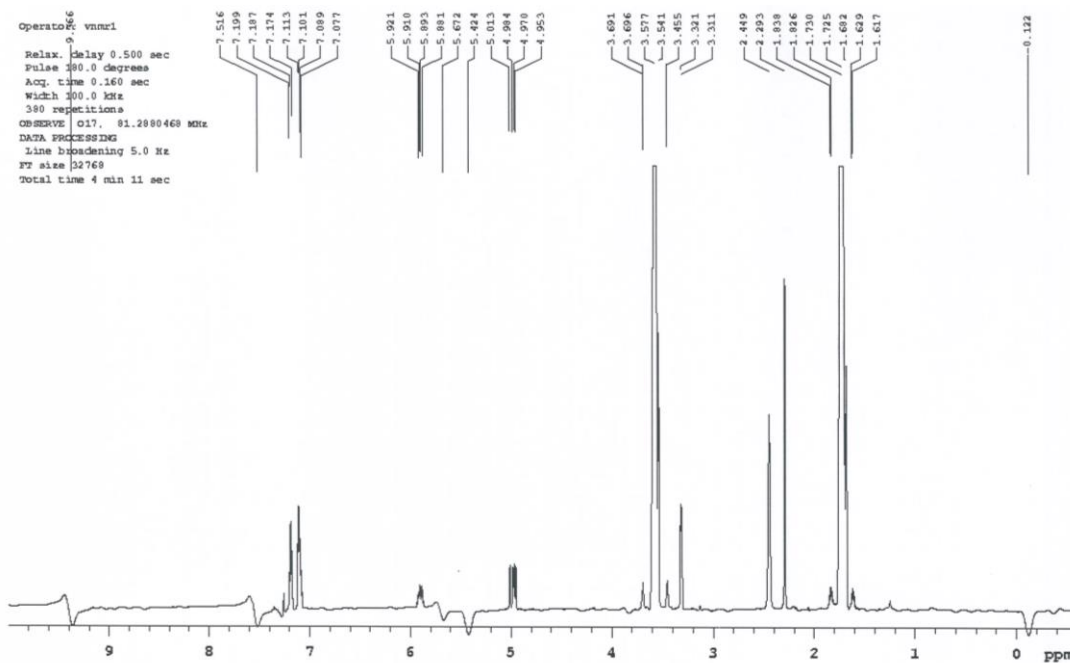



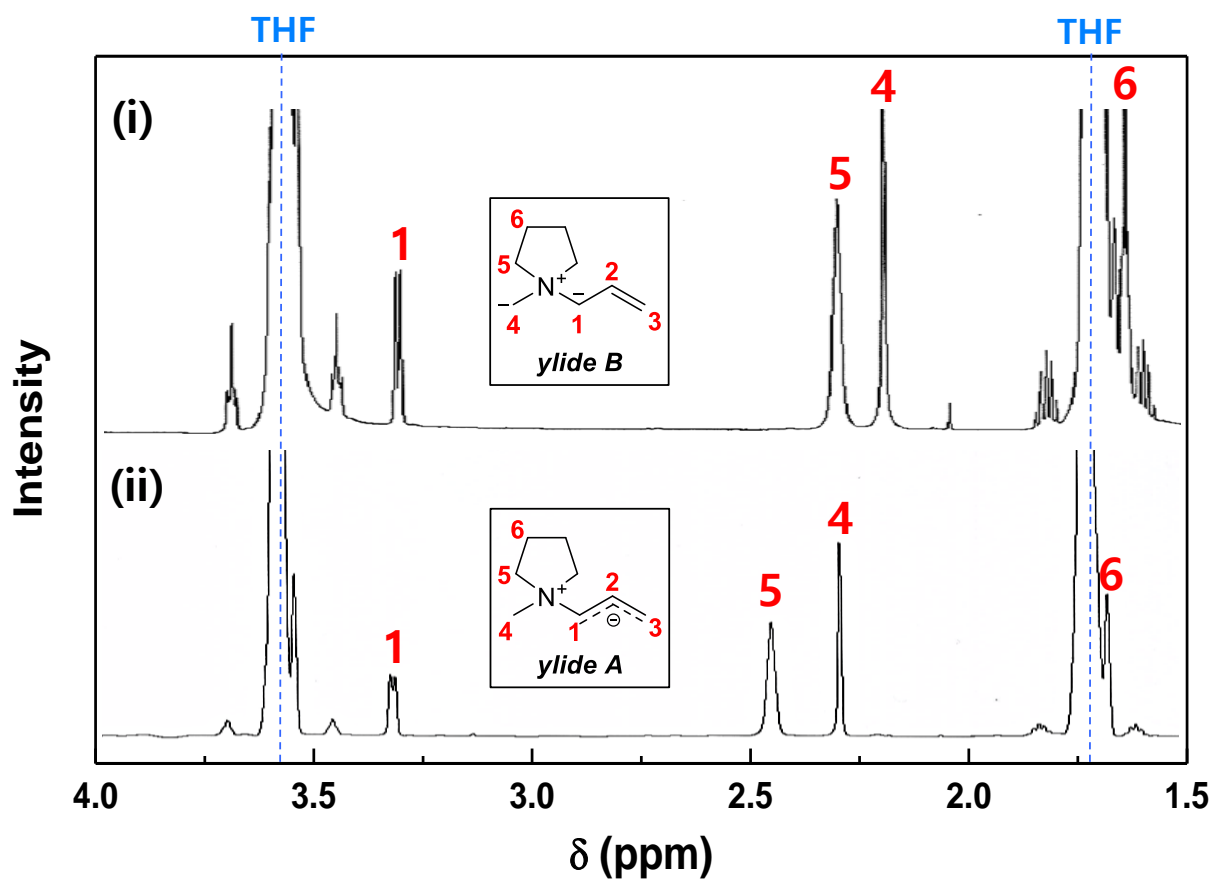

Fig. S6. The enlarged <sup>1</sup>H NMR spectrum (600 MHz, THF-d<sub>8</sub>, 25 °C) of (i) 2:1 and (ii) 1:1 molar ratio of the PhMgCl-AMPyrrCl complex in the range of 1.5~4 ppm.

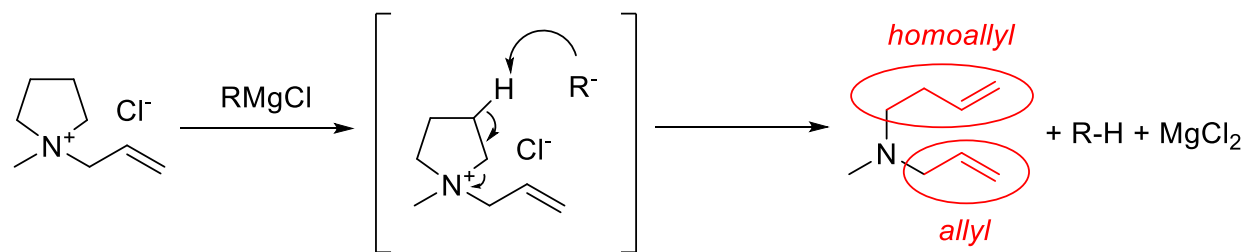

**Fig. S7. Plausible reaction mechanism for Hofmann elimination of AMPyrrCl by Grignard reagent.** The plausible reaction mechanism predicts the formation of tertiary amine, allyl-homoallyl-methylamine. However, we could not observe <sup>1</sup>H peaks corresponding to individual allyl and homoallyl group in <sup>1</sup>H NMR spectrum, but just one allylic <sup>1</sup>H pattern was observed.

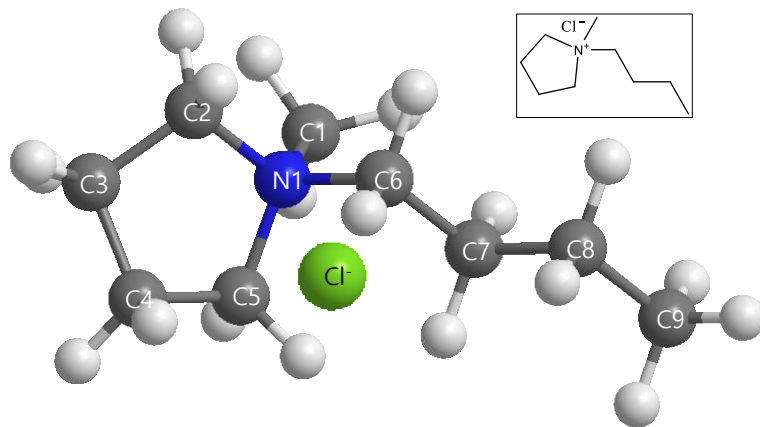

**Fig. S8.** The molecular structure of *N*-butyl-*N*-methylpyrrolidinium chloride (BMPyrrCl).

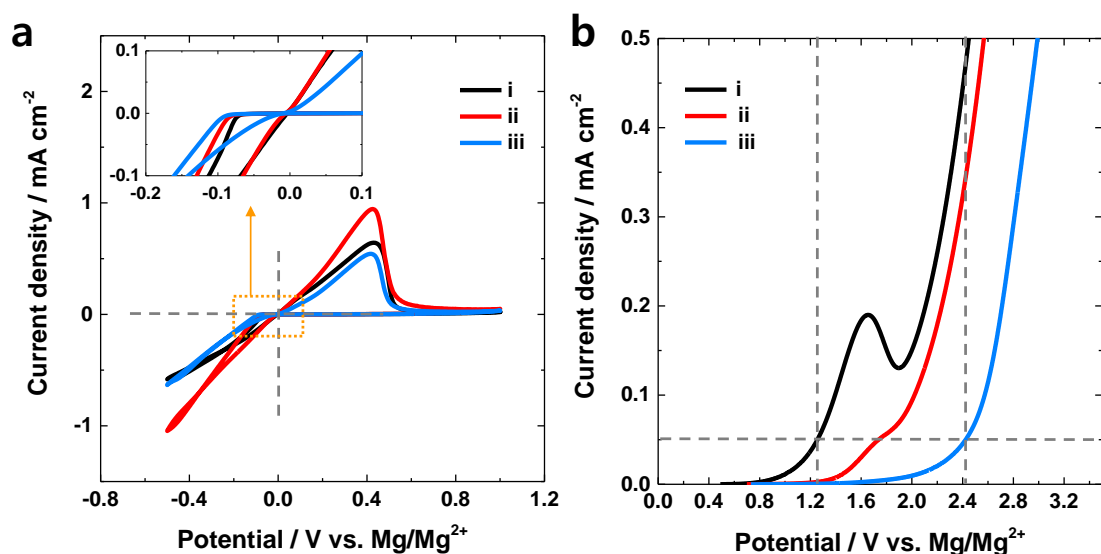

**Fig. S9.** a) Cyclic voltammograms (5<sup>th</sup> cycle) and b) linear sweep voltammograms for a series of electrolytes combining 0.4 M of EtMgCl with i) 0 M, ii) 0.1 M and iii) 0.2 M of AMPyrrCl. Inset in a) shows an enlarged picture near the onset of Mg deposition marked with an orange square. All experiments were conducted with a Ni working electrode and Mg counter/reference electrodes at a scan rate of 1 mV s<sup>-1</sup> for CV and 25 mV s<sup>-1</sup> for LSV.

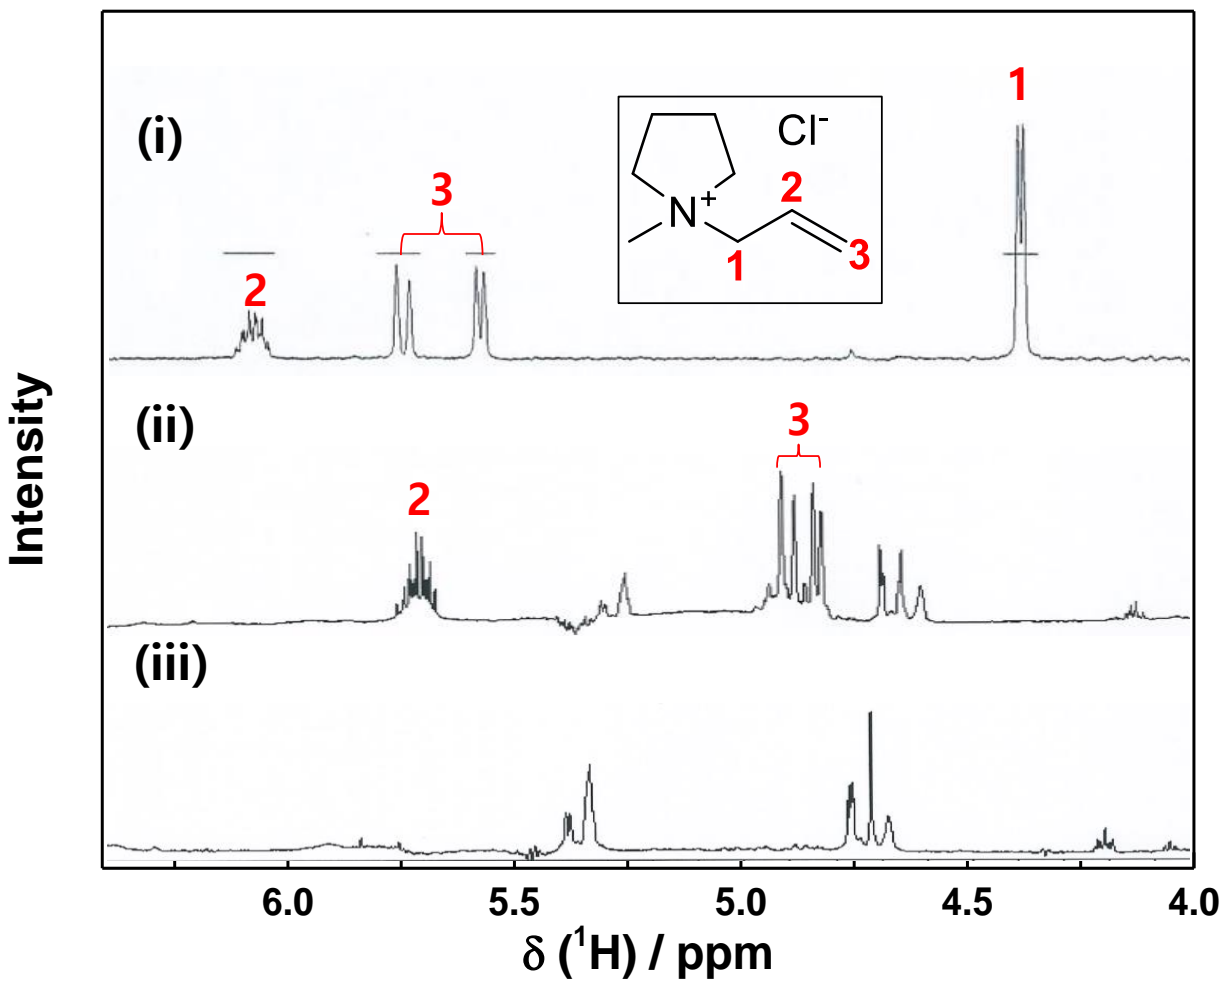

Fig. S10.  $^1\text{H}$  NMR spectra (600 MHz, THF- $d_8$ , 25 °C) of (i) AMPyrrCl, (ii) 2:1 molar ratio of EtMgCl-AMPyrrCl, and (iii) EtMgCl in THF.

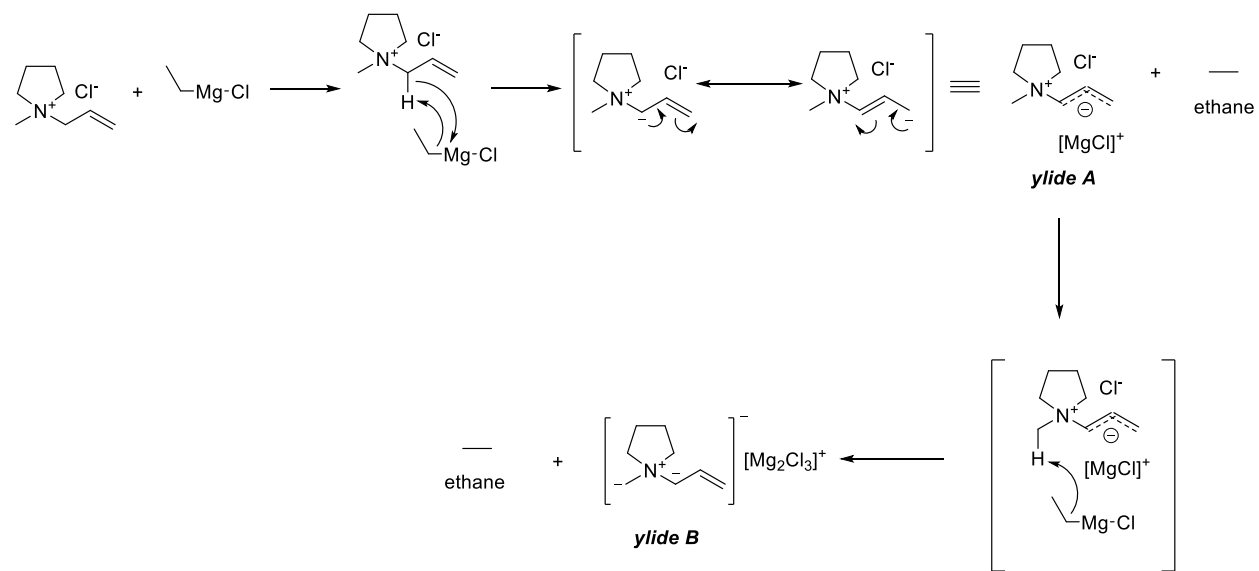

**Fig. S11. Proposed reaction mechanism between AMPyrrCl and EtMgCl in THF.**
